# Supplementary material for: Hibernating above the permafrost: effects of ambient temperature and season on expression of metabolic genes in liver and brown adipose tissue of arctic ground squirrels
Source: Oxford University Press journal article supplement (doi:10.1242/jeb.052159), 2011-03-23
Supplement: jeb052159tables1.pdf [file jeb052159tables1.pdf]

Table S1. Primer sequences used for ground squirrel qRT-PCR

| Gene symbol   | Protein                                                                      | Direction | Sequence                  | Source          | Size (bp) |
|---------------|------------------------------------------------------------------------------|-----------|---------------------------|-----------------|-----------|
| <i>ACAA1</i>  | acetyl-Coenzyme A acyltransferase 1                                          | Forward   | CTGTGTGGAGAAGCTAGGAATCC   | UP <sup>a</sup> | 51        |
|               |                                                                              | Reverse   | CCTCCCAGAGGGTTCACCTT      |                 |           |
| <i>ACAA2</i>  | acetyl-Coenzyme A acyltransferase 2                                          | Forward   | AGCCTTTGCTCCCAGTATT       | IT <sup>a</sup> | 180       |
|               |                                                                              | Reverse   | GCTGATCCAACGGCATATTT      |                 |           |
| <i>ACADM</i>  | acyl-Coenzyme A dehydrogenase, C-4 to C-12 straight chain                    | Forward   | GGGAGCTTTTGATAGAACCA      | UP <sup>b</sup> | 91        |
|               |                                                                              | Reverse   | CAGGGCATACTTGGTAGCTT      |                 |           |
| <i>ACADVL</i> | acyl-Coenzyme A dehydrogenase, very long chain                               | Forward   | GACATTCTTCGGCTCTTTGT      | UP <sup>b</sup> | 129       |
|               |                                                                              | Reverse   | CTGTTTTCCCTGCCTCTCCTA     |                 |           |
| <i>ACAT1</i>  | acetyl-Coenzyme A acetyltransferase 1                                        | Forward   | ATTGATCCCCAAAAGTGAA       | UP <sup>b</sup> | 146       |
|               |                                                                              | Reverse   | CCTCCTCCATTGCAGATACT      |                 |           |
| <i>ACAT2</i>  | acetyl-Coenzyme A acetyltransferase 2                                        | Forward   | GCCATGGGAGTAACCTTGAA      | CL <sup>a</sup> | 245       |
|               |                                                                              | Reverse   | AGCTTGCTTTATGGCTGGAA      |                 |           |
| <i>ACSL3</i>  | acyl-CoA synthetase long-chain family member 3                               | Forward   | TGAAGCAAAAACAAAAGCTG      | UP <sup>b</sup> | 94        |
|               |                                                                              | Reverse   | ACAACCATCAGGGTCAAACCT     |                 |           |
| <i>AGPAT3</i> | 1-acylglycerol-3-phosphate O-acyltransferase 3                               | Forward   | TGGTCATCATCCTCAATCAC      | UP <sup>b</sup> | 104       |
|               |                                                                              | Reverse   | CTTCTTAGCGAGGACTTTGG      |                 |           |
| <i>ARG1</i>   | arginase, liver                                                              | Forward   | GATGCTCACACGGATATCAA      | UP <sup>b</sup> | 114       |
|               |                                                                              | Reverse   | TCCTGGTACATCAGGGATCT      |                 |           |
| <i>BCKDHA</i> | E1-alpha subunit of the branched-chain alpha-keto acid dehydrogenase complex | Forward   | GCCAGATGCCTGTCCACTAT      | IT <sup>a</sup> | 235       |
|               |                                                                              | Reverse   | TTGTTCCGGCAGAAGAAGAT      |                 |           |
| <i>BCKDHB</i> | branched chain keto acid dehydrogenase E1, beta polypeptide                  | Forward   | GGCTTTGCGTCAGAGATCAG      | IT <sup>a</sup> | 160       |
|               |                                                                              | Reverse   | TTTTCCGAAGGGCATCATAG      |                 |           |
| <i>BDH2</i>   | 3-hydroxybutyrate dehydrogenase, type 2                                      | Forward   | TGTTGCTGGTTTTGTTTCATC     | UP <sup>b</sup> | 126       |
|               |                                                                              | Reverse   | GCAAGCATTTTAGGAAGGAA      |                 |           |
| <i>CACT</i>   | carnitine/acylcarnitine translocase                                          | Forward   | GCTTCTTTGGGTTTGGTTTG      | CL <sup>a</sup> | 203       |
|               |                                                                              | Reverse   | TGCACAGTCCAAGGTACCAG      |                 |           |
| <i>CPT1A</i>  | carnitine palmitoyltransferase 1A, liver                                     | Forward   | CATCGTCACCATGCGCTACT      | UP <sup>a</sup> | 51        |
|               |                                                                              | Reverse   | CAGCCGTGGTAGGAGAGCAG      |                 |           |
| <i>CPT1B</i>  | carnitine palmitoyltransferase 1B, muscle                                    | Forward   | GCCACAATTCAGCGGTACTT      | IT <sup>a</sup> | 215       |
|               |                                                                              | Reverse   | CTGTTACCATTGAGGGGACT      |                 |           |
| <i>CRAT</i>   | carnitine acetyltransferase                                                  | Forward   | GGCCCATATCAACTTCTCTG      | UP <sup>b</sup> | 110       |
|               |                                                                              | Reverse   | GAAGTAGGGTACGCATGTCC      |                 |           |
| <i>CS</i>     | citrate synthase                                                             | Forward   | GGCCATAGTATCCCTGAATG      | UP <sup>b</sup> | 117       |
|               |                                                                              | Reverse   | CTGTTCTCTGTTGGGATCT       |                 |           |
| <i>ELOVL6</i> | ELOVL family member 6, elongation of long chain fatty acids                  | Forward   | ACCTCAGCTACCTTGTGCTC      | UP <sup>b</sup> | 81        |
|               |                                                                              | Reverse   | ATTCAGCCTTCGTTGTTTTT      |                 |           |
| <i>Fabp1</i>  | fatty acid binding protein 1, liver                                          | Forward   | CACTTCAAGCTCACCATCAC      | UP <sup>b</sup> | 115       |
|               |                                                                              | Reverse   | TGTTGACCACTGTCTTGACC      |                 |           |
| <i>FABP4</i>  | fatty acid binding protein 4, adipocyte                                      | Forward   | GCCAGGAATTTGATGAAGTC      | UP <sup>b</sup> | 94        |
|               |                                                                              | Reverse   | ATCCACTTCTGCACCTGAAC      |                 |           |
| <i>G6PC</i>   | glucose-6-phosphatase, catalytic subunit                                     | Forward   | GATGGAGGAAGGAATGAATG      | UP <sup>b</sup> | 118       |
|               |                                                                              | Reverse   | GAGGTACGAATCACAGACA       |                 |           |
| <i>GAPDH</i>  | glyceraldehyde-3-phosphate dehydrogenase                                     | Forward   | AAGGTCATCCCTGAACTGAA      | UP <sup>b</sup> | 114       |
|               |                                                                              | Reverse   | ATCGTATTTGGCAGCTTTCT      |                 |           |
| <i>GLUD1</i>  | Glutamate dehydrogenase 1                                                    | Forward   | GTGCATTCTGGCTTAGCCTACA    | UP <sup>a</sup> | 51        |
|               |                                                                              | Reverse   | CATAATTTGCCTGGCTGAACG     |                 |           |
| <i>GOT1</i>   | glutamic-oxaloacetic transaminase 1                                          | Forward   | CTGCTCAGGGAGCACGAATT      | UP <sup>a</sup> | 51        |
|               |                                                                              | Reverse   | CACATTGCCTGTCCATTCTTTAAAG |                 |           |
| <i>GOT2</i>   | glutamic-oxaloacetic transaminase 2                                          | Forward   | CGGTACTATGACCCCAAGAC      | UP <sup>b</sup> | 92        |
|               |                                                                              | Reverse   | TGCAGGAGAAGAACAACCTCTG    |                 |           |
| <i>Gpd1</i>   | Glycerol -3-phosphate dehydrogenase 1                                        | Forward   | CTCTGAAGTGATTGGGGAAC      | UP <sup>b</sup> | 88        |
|               |                                                                              | Reverse   | GAACTTCTCATCAGCCACCT      |                 |           |
| <i>GSK3A</i>  | glycogen synthase kinase 3 alpha                                             | Forward   | CTGACACTGCTGCCTCAAG       | UP <sup>b</sup> | 144       |
|               |                                                                              | Reverse   | CGATGGACGAGGTATAATCA      |                 |           |
| <i>GSY1</i>   | glycogen synthase 1, muscle                                                  | Forward   | ACCATCTTACCACCCATGC       | CL <sup>a</sup> | 51        |

|               |                                                     |         |                       |                 |     |
|---------------|-----------------------------------------------------|---------|-----------------------|-----------------|-----|
| <i>GSY2</i>   | glycogen synthase 2                                 | Reverse | ACCAGCACACAGGTAGCGC   | UP <sup>a</sup> | 51  |
|               |                                                     | Forward | CATCACCACCAGCGACAGAA  |                 |     |
| <i>HADHA</i>  | hydroxyacyl-Coenzyme A dehydrogenase, alpha subunit | Reverse | GTAAGGAAAGGCCTGGGATA  | UP <sup>b</sup> | 116 |
|               |                                                     | Forward | TGTCAGCAAAAGACCTGAGA  |                 |     |
| <i>HADHSC</i> | short-chain L-3-hydroxyacyl-CoA dehydrogenase       | Reverse | CAGAAGCAGTTGTGTCCTTG  | UP <sup>b</sup> | 76  |
|               |                                                     | Forward | TCTTTGCAGATCACAAGCAT  |                 |     |
| <i>HK1</i>    | Hexokinase 1                                        | Reverse | CTGGGTTGAAGAAATGAAGG  | UP <sup>b</sup> | 102 |
|               |                                                     | Forward | CGTGGATGGGACACTCTACA  |                 |     |
| <i>HMGCL</i>  | 3-hydroxymethyl-3-methylglutaryl-Coenzyme A lyase   | Reverse | GACAGGAGGAAGGACACGTT  | UP <sup>b</sup> | 96  |
|               |                                                     | Forward | GTACGTCTCCTGTGTGCTTG  |                 |     |
| <i>HMGCS2</i> | 3-hydroxymethyl-3-methylglutaryl-Coenzyme A lyase   | Reverse | TAGCAGCCCATTGAGTACAA  | UP <sup>b</sup> | 138 |
|               |                                                     | Forward | CCCTTTACCTTTCCACACAC  |                 |     |
| <i>HPD</i>    | 4-hydroxyphenylpyruvate dioxygenase                 | Reverse | CTAAGCCAGAGCCATAGGAG  | CL <sup>a</sup> | 51  |
|               |                                                     | Forward | CCTGAGAGAGGCCGATTCTCT |                 |     |
| <i>HPRT1</i>  | hypoxanthine phosphoribosyltransferase 1            | Reverse | GCCAACCCAGAAGGTCACAG  | UP <sup>b</sup> | 124 |
|               |                                                     | Forward | CGACCTGACTTTGTTGGATT  |                 |     |
| <i>HSL</i>    | Hormone-Sensitive Lipase                            | Reverse | ATTTTGTCTTCCAGTTTCA   | UP <sup>a</sup> | 51  |
|               |                                                     | Forward | TTGCGCGAGTATGTCACACTG |                 |     |
| <i>IDH2</i>   | isocitrate dehydrogenase 2 (NADP+), mitochondrial   | Reverse | CAAGCAGCGCCATAGAAAC   | UP <sup>b</sup> | 109 |
|               |                                                     | Forward | GATGGTCTTCACTCCAAAGG  |                 |     |
| <i>IDH3B</i>  | isocitrate dehydrogenase 3 (NAD+) beta              | Reverse | CGAGATGGACTCATCGGTAT  | UP <sup>b</sup> | 88  |
|               |                                                     | Forward | GCCAAATGTAGTCCATGTGAA |                 |     |
| <i>LDHB</i>   | lactate dehydrogenase B                             | Reverse | CTTCTGTCTGCTCACGAATG  | UP <sup>b</sup> | 78  |
|               |                                                     | Forward | TCTCAATCTGGTGCAGAGAA  |                 |     |
| <i>MDH2</i>   | malate dehydrogenase 2, NAD, mitochondrial          | Reverse | ATGCAATCGGGACTGTACTT  | UP <sup>b</sup> | 111 |
|               |                                                     | Forward | ATCCCAATCACAGCAGAAGT  |                 |     |
| <i>OTC</i>    | ornithine carbamoyltransferase                      | Reverse | CAGCTCTGCAACAAAAGTGT  | UP <sup>b</sup> | 130 |
|               |                                                     | Forward | CATCCTGGCTAGAGAAGCAT  |                 |     |
| <i>OXCT1</i>  | 3-oxoacid CoA transferase 1                         | Reverse | GCTGAGGGTAAGACCTTTGA  | UP <sup>b</sup> | 83  |
|               |                                                     | Forward | GGACAGTAAGAAAGGGCTGA  |                 |     |
| <i>PAH</i>    | Phenylalanine hydroxylase                           | Reverse | AATCACACCCAGTGCTCTTT  | UP <sup>b</sup> | 87  |
|               |                                                     | Forward | GGACAGGAAACGAGCTACAT  |                 |     |
| <i>PCK1</i>   | Phosphoenolpyruvate carboxykinase 1                 | Reverse | TGCACCAACTTCTTCTTTGA  | UP <sup>b</sup> | 104 |
|               |                                                     | Forward | ATCGACTACATCCCAAGAA   |                 |     |
| <i>PCK2</i>   | phosphoenolpyruvate carboxykinase 2, mitochondrial  | Reverse | ACTTCCTCCTCCAGAACTC   | UP <sup>a</sup> | 51  |
|               |                                                     | Forward | AGTGAAGGTCGACTCCGGG   |                 |     |
| <i>PDHE1B</i> | pyruvate dehydrogenase E1 beta                      | Reverse | GCCACCCCAAAGAAACCATT  | UP <sup>b</sup> | 75  |
|               |                                                     | Forward | GGATGTGGAAGTGGAAAGAG  |                 |     |
| <i>PDK1</i>   | pyruvate dehydrogenase kinase, isozyme 1            | Reverse | TTGTATGCCCATCATACTG   | CL <sup>a</sup> | 164 |
|               |                                                     | Forward | GGGATATGGGACAGATGCAG  |                 |     |
| <i>PDK2</i>   | pyruvate dehydrogenase kinase, isozyme 2            | Reverse | GGAACGTGGTCATGTCTTT   | UP <sup>b</sup> | 93  |
|               |                                                     | Forward | TCCAACCAGAACATCCAGTA  |                 |     |
| <i>PDK4</i>   | pyruvate dehydrogenase kinase, isozyme 4            | Reverse | ATCAAAGATGAGGGTGTGCT  | IT <sup>a</sup> | 161 |
|               |                                                     | Forward | GAGCTTTTCTCCCGCTACAG  |                 |     |
| <i>PFKL</i>   | phosphofructokinase, liver                          | Reverse | CGATCAGGGAGGACATCAAT  | UP <sup>a</sup> | 130 |
|               |                                                     | Forward | GTGATCGCATCAAACAGTCG  |                 |     |
| <i>PFKM</i>   | phosphofructokinase, muscle                         | Reverse | AAGACGTAGGCAGCATCAGC  | UP <sup>b</sup> | 116 |
|               |                                                     | Forward | GTGGTGAGCCTCTCTGGTAA  |                 |     |
| <i>PKM2</i>   | pyruvate kinase, muscle                             | Reverse | AGCTTCATGGCTTCATCAA   | UP <sup>b</sup> | 108 |
|               |                                                     | Forward | GAACGTCGCTCGTCTAAACT  |                 |     |
| <i>RPS3</i>   | ribosomal protein S3                                | Reverse | TAGAGAATGGGGTCAGAAGC  | UP <sup>b</sup> | 149 |
|               |                                                     | Forward | ACTCCGAGGACAGAGAGCTA  |                 |     |
| <i>SC4MOL</i> | sterol-C4-methyl oxidase-like                       | Reverse | GCAGCATGATCTTCACTTTG  | UP <sup>b</sup> | 82  |
|               |                                                     | Forward | GTTGGAAAACCAATGGAAAT  |                 |     |
| <i>SCD</i>    | stearoyl-CoA desaturase, delta-9-desaturase         | Reverse | ATGGGTTCCACAAATCAAAG  | CL <sup>a</sup> | 51  |
|               |                                                     | Forward | CCGACCCTCATAACTCTCGC  |                 |     |
| <i>SUCLG1</i> | succinate-CoA ligase, alpha subunit                 | Reverse | GCCAACCCACGTGAGAGAAG  | UP <sup>b</sup> | 99  |
|               |                                                     | Forward | TGGTGATGCAGAAGAAAATG  |                 |     |

|              |                                    |         |                       |                 |     |
|--------------|------------------------------------|---------|-----------------------|-----------------|-----|
| <i>UGP2</i>  | UDP-glucose pyrophosphorylase 2    | Reverse | GGAGCAGTTAAACCAGCAAT  | UP <sup>b</sup> | 148 |
|              |                                    | Forward | AAGATGGTGCCTCTCAGTTC  |                 |     |
| <i>YWHAZ</i> | protein kinase C inhibitor protein | Reverse | TGAAATAGCTTCCGAAATCC  | UP <sup>b</sup> | 147 |
|              |                                    | Forward | GGGCTAAGTTATACCCAAAGC |                 |     |
|              |                                    | Reverse | AGAAAACATTGTCCTGCTC   |                 |     |

Source indicates species of EST sequence used to develop primers (CL, *Callospermophilus lateralis*; IT, *Ictidomys tridecemlineatus*; UP, *Urocitellus parryi*) and source of the EST sequence (<sup>a</sup>Yan et al., 2008; <sup>b</sup>present study).

Size indicates length of the amplicon.
