# Supplementary material for: Hibernating above the permafrost: effects of ambient temperature and season on expression of metabolic genes in liver and brown adipose tissue of arctic ground squirrels
Source: Oxford University Press journal article supplement (doi:10.1242/jeb.052159), 2011-03-23
Supplement: jeb052159tables2.pdf [file jeb052159tables2.pdf]

Table S2. Normalized gene expression values (means  $\pm$  s.d.) for liver samples taken from hibernating and post-reproductive arctic ground squirrels

| Gene          | +2°C hibernator | -10°C hibernator | Post-reproductive | FDR-adjusted <i>P</i> |
|---------------|-----------------|------------------|-------------------|-----------------------|
| <i>ACACB</i>  | 0.06±0.01       | 0.07±0.04        | 1.01±0.12         | 0.003                 |
| <i>PAH</i>    | 0.39±0.10       | 0.43±0.17        | 1.01±0.15         | 0.003                 |
| <i>CPT1A</i>  | 9.00±6.59       | 8.66±2.57        | 1.07±0.42         | 0.008                 |
| <i>PCK1</i>   | 9.99±4.68       | 8.17±2.76        | 1.21±0.99         | 0.008                 |
| <i>FABP1</i>  | 3.33±1.43       | 4.18±1.51        | 1.05±0.34         | 0.017                 |
| <i>SCD</i>    | 0.01±0.01       | 0.01±0.01        | 1.07±0.39         | 0.017                 |
| <i>ACAT2</i>  | 0.33±0.08       | 0.33±0.05        | 1.03±0.28         | 0.022                 |
| <i>BCKDHA</i> | 0.69±0.09       | 0.69±0.20        | 1.01±0.12         | 0.024                 |
| <i>PDK1</i>   | 0.91±0.18       | 0.68±0.14        | 1.00±0.04         | 0.024                 |
| <i>HMGCS2</i> | 1.96±0.38       | 2.03±0.26        | 1.06±0.41         | 0.030                 |
| <i>ACAT1</i>  | 1.35±0.20       | 1.41±0.21        | 1.01±0.14         | 0.036                 |
| <i>PFKM</i>   | 0.27±0.17       | 0.22±0.12        | 1.07±0.40         | 0.039                 |
| <i>ELOVL6</i> | 0.02±0.01       | 0.04±0.04        | 1.08±0.50         | 0.044                 |
| <i>OTC</i>    | 0.85±0.11       | 0.63±0.14        | 1.01±0.18         | 0.049                 |
| <i>IDH2</i>   | 1.84±0.52       | 2.07±0.55        | 1.05±0.40         | 0.050                 |
| <i>GOT1</i>   | 1.77±0.55       | 0.72±0.37        | 1.08±0.43         | 0.052                 |
| <i>AGPAT3</i> | 0.50±0.18       | 0.50±0.23        | 1.03±0.29         | 0.062                 |
| <i>GAPDH</i>  | 0.86±0.11       | 0.77±0.11        | 1.00±0.11         | 0.075                 |
| <i>G6PC</i>   | 1.19±0.54       | 1.39±0.26        | 1.00±0.07         | 0.087                 |
| <i>HPD</i>    | 1.14±0.30       | 0.68±0.19        | 1.08±0.40         | 0.090                 |
| <i>ACADVL</i> | 1.53±0.43       | 1.70±0.34        | 1.04±0.35         | 0.105                 |
| <i>GLUD1</i>  | 1.41±0.50       | 1.59±0.43        | 1.02±0.21         | 0.118                 |
| <i>CRAT</i>   | 1.57±0.61       | 1.38±0.37        | 1.01±0.18         | 0.161                 |
| <i>FABP4</i>  | 2.02±1.35       | 3.91±2.44        | 1.15±0.62         | 0.161                 |
| <i>AGR1</i>   | 0.71±0.13       | 0.64±0.23        | 1.03±0.28         | 0.214                 |
| <i>GSY1</i>   | 0.66±0.20       | 0.78±0.13        | 1.02±0.26         | 0.218                 |
| <i>LDHB</i>   | 1.08±0.55       | 0.61±0.15        | 1.10±0.57         | 0.218                 |
| <i>UGP2</i>   | 0.84±0.05       | 1.00±0.23        | 1.01±0.16         | 0.218                 |
| <i>ACSL3</i>  | 0.71±0.18       | 0.69±0.16        | 1.03±0.28         | 0.225                 |
| <i>PDK2</i>   | 1.04±0.38       | 0.61±0.36        | 1.10±0.46         | 0.246                 |
| <i>CS</i>     | 0.56±0.09       | 0.52±0.18        | 1.11±0.55         | 0.290                 |
| <i>ACAA2</i>  | 1.45±0.27       | 1.41±0.27        | 1.05±0.35         | 0.294                 |
| <i>HADHA</i>  | 1.64±0.40       | 1.59±0.56        | 1.08±0.49         | 0.295                 |
| <i>GSK3A</i>  | 0.79±0.32       | 0.59±0.29        | 1.17±0.62         | 0.336                 |
| <i>GSY2</i>   | 1.25±0.36       | 0.88±0.28        | 1.03±0.24         | 0.341                 |
| <i>ACADM</i>  | 0.81±0.15       | 0.70±0.21        | 1.05±0.36         | 0.372                 |
| <i>BDH2</i>   | 0.95±0.32       | 1.16±0.18        | 1.01±0.12         | 0.384                 |
| <i>HADHSC</i> | 0.94±0.09       | 1.08±0.21        | 1.00±0.07         | 0.384                 |
| <i>OXCT1</i>  | 0.69±0.21       | 0.85±0.14        | 1.16±0.75         | 0.384                 |
| <i>PCK2</i>   | 1.25±0.33       | 0.96±0.23        | 1.05±0.35         | 0.396                 |
| <i>BCKDHB</i> | 1.08±0.19       | 0.85±0.26        | 1.02±0.26         | 0.406                 |
| <i>GPD1</i>   | 0.90±0.25       | 0.79±0.21        | 1.03±0.28         | 0.459                 |
| <i>HK1</i>    | 1.17±0.66       | 1.32±0.42        | 1.02±0.23         | 0.510                 |
| <i>PFKL</i>   | 0.89±0.26       | 1.08±0.20        | 1.03±0.30         | 0.539                 |
| <i>HSL</i>    | 0.85±0.48       | 0.74±0.37        | 1.05±0.36         | 0.544                 |
| <i>SUCLG1</i> | 0.99±0.25       | 0.90±0.09        | 1.03±0.32         | 0.638                 |
| <i>PKM2</i>   | 1.06±0.46       | 0.80±0.51        | 1.13±0.55         | 0.654                 |
| <i>CACT</i>   | 1.31±0.56       | 1.04±0.31        | 1.03±0.31         | 0.666                 |
| <i>MDH2</i>   | 1.09±0.18       | 1.11±0.22        | 1.01±0.15         | 0.720                 |
| <i>PYGB</i>   | 0.99±0.31       | 1.13±0.27        | 1.13±0.61         | 0.760                 |
| <i>IDH3B</i>  | 1.01±0.39       | 0.89±0.32        | 1.06±0.41         | 0.771                 |
| <i>GOT2</i>   | 1.22±0.33       | 1.21±0.41        | 1.05±0.41         | 0.786                 |
| <i>PDHE1B</i> | 0.94±0.13       | 0.92±0.20        | 1.02±0.21         | 0.786                 |
| <i>ACAA1</i>  | 1.24±0.65       | 1.29±0.40        | 1.09±0.47         | 0.789                 |
| <i>HMGCL</i>  | 1.01±0.22       | 0.92±0.32        | 1.02±0.21         | 0.812                 |

False discovery rate (FDR)-adjusted *P*-values are for Welch's ANOVA tests for differences in group means.
