# Supplementary material for: Hibernating above the permafrost: effects of ambient temperature and season on expression of metabolic genes in liver and brown adipose tissue of arctic ground squirrels
Source: Oxford University Press journal article supplement (doi:10.1242/jeb.052159), 2011-03-23
Supplement: jeb052159tables3.pdf [file jeb052159tables3.pdf]

Table S3. Normalized gene expression values (means  $\pm$  s.d.) for liver samples taken from arctic ground squirrels hibernating at ambient temperatures of +2 and  $-10^{\circ}\text{C}$  during late arousal and late torpor

| Gene          | +2°C late arousal | $-10^{\circ}\text{C}$ late arousal | +2°C late torpor | $-10^{\circ}\text{C}$ late torpor | FDR-adjusted <i>P</i> |
|---------------|-------------------|------------------------------------|------------------|-----------------------------------|-----------------------|
| <i>GSY1</i>   | 3.52±0.29         | 2.56±0.96                          | 0.82±0.31        | 1.05±0.35                         | 0.005                 |
| <i>AGPAT3</i> | 2.45±0.24         | 1.66±0.50                          | 1.47±0.65        | 1.07±0.45                         | 0.021                 |
| <i>GSK3A</i>  | 2.54±0.25         | 1.70±0.91                          | 1.38±0.47        | 1.09±0.51                         | 0.021                 |
| <i>PFKL</i>   | 2.65±0.23         | 2.08±1.09                          | 1.64±0.73        | 1.12±0.59                         | 0.054                 |
| <i>HADHSC</i> | 1.05±0.16         | 1.23±0.40                          | 0.70±0.09        | 1.01±0.17                         | 0.080                 |
| <i>ACACB</i>  | 0.59±0.20         | 0.67±0.19                          | 1.09±0.38        | 1.01±0.15                         | 0.097                 |
| <i>ACAT2</i>  | 1.26±0.15         | 1.79±0.79                          | 0.76±0.19        | 1.08±0.46                         | 0.097                 |
| <i>CACT</i>   | 1.11±0.20         | 1.21±0.40                          | 0.66±0.12        | 1.06±0.36                         | 0.097                 |
| <i>PDHE1B</i> | 1.03±0.10         | 1.25±0.31                          | 0.76±0.11        | 1.02±0.19                         | 0.097                 |
| <i>ARG1</i>   | 0.83±0.19         | 1.38±0.31                          | 0.73±0.18        | 1.09±0.45                         | 0.098                 |
| <i>CPT1A</i>  | 2.75±0.66         | 1.29±0.59                          | 1.17±0.30        | 1.05±0.35                         | 0.098                 |
| <i>G6PC</i>   | 1.79±0.63         | 1.52±0.82                          | 0.61±0.21        | 1.05±0.32                         | 0.098                 |
| <i>GOT1</i>   | 1.34±0.75         | 2.79±1.11                          | 0.73±0.19        | 1.55±1.62                         | 0.098                 |
| <i>GSY2</i>   | 1.21±0.56         | 1.21±0.43                          | 0.53±0.08        | 1.08±0.47                         | 0.098                 |
| <i>PKM2</i>   | 2.02±0.62         | 1.44±0.24                          | 2.11±1.64        | 1.02±0.23                         | 0.098                 |
| <i>HMGCL</i>  | 2.04±0.63         | 1.88±0.86                          | 1.30±0.31        | 1.05±0.34                         | 0.114                 |
| <i>OXCT1</i>  | 1.55±0.20         | 1.38±0.31                          | 0.94±0.44        | 1.02±0.23                         | 0.119                 |
| <i>GOT2</i>   | 1.42±0.18         | 1.57±0.48                          | 0.95±0.32        | 1.04±0.29                         | 0.130                 |
| <i>PCK2</i>   | 3.02±0.73         | 2.23±1.54                          | 1.67±0.70        | 1.14±0.71                         | 0.130                 |
| <i>HADHA</i>  | 1.73±0.39         | 1.28±0.40                          | 0.97±0.27        | 1.03±0.25                         | 0.135                 |
| <i>HK1</i>    | 1.68±0.25         | 1.46±0.28                          | 1.70±0.56        | 1.06±0.40                         | 0.135                 |
| <i>GPD1</i>   | 0.97±0.22         | 0.95±0.18                          | 1.39±0.24        | 1.04±0.33                         | 0.177                 |
| <i>IDH3B</i>  | 1.29±0.24         | 1.37±0.38                          | 0.87±0.19        | 1.02±0.19                         | 0.177                 |
| <i>MDH2</i>   | 1.31±0.15         | 1.20±0.32                          | 0.93±0.20        | 1.08±0.44                         | 0.183                 |
| <i>ACADVL</i> | 1.81±0.31         | 1.51±0.64                          | 1.20±0.45        | 1.12±0.56                         | 0.202                 |
| <i>ACAT1</i>  | 1.07±0.29         | 1.03±0.29                          | 0.80±0.10        | 1.01±0.14                         | 0.207                 |
| <i>BDH2</i>   | 1.06±0.27         | 1.24±0.19                          | 0.77±0.29        | 1.03±0.25                         | 0.207                 |
| <i>LDHB</i>   | 0.54±0.22         | 0.51±0.08                          | 0.70±0.19        | 0.95±0.41                         | 0.207                 |
| <i>GLUD1</i>  | 1.33±0.34         | 1.48±0.16                          | 1.62±0.70        | 1.05±0.33                         | 0.229                 |
| <i>UGP2</i>   | 1.27±0.45         | 1.17±0.26                          | 0.79±0.20        | 1.02±0.19                         | 0.229                 |
| <i>OTC</i>    | 0.84±0.29         | 1.21±0.31                          | 0.79±0.18        | 1.06±0.40                         | 0.276                 |
| <i>CS</i>     | 1.37±0.22         | 1.30±0.33                          | 1.15±0.21        | 1.03±0.25                         | 0.303                 |
| <i>GAPDH</i>  | 0.92±0.11         | 1.02±0.13                          | 0.85±0.11        | 1.01±0.17                         | 0.326                 |
| <i>ELOVL6</i> | 1.35±0.81         | 1.28±0.66                          | 0.73±0.30        | 1.08±0.44                         | 0.428                 |
| <i>SUCLG1</i> | 1.07±0.14         | 1.12±0.40                          | 0.87±0.13        | 1.02±0.25                         | 0.442                 |
| <i>ACAA2</i>  | 0.94±0.17         | 1.07±0.34                          | 0.77±0.21        | 1.08±0.45                         | 0.476                 |
| <i>PCK1</i>   | 1.09±0.85         | 0.77±0.83                          | 0.65±0.23        | 1.07±0.42                         | 0.476                 |
| <i>BCKDHB</i> | 0.87±0.18         | 1.01±0.26                          | 0.82±0.07        | 1.06±0.39                         | 0.477                 |
| <i>CRAT</i>   | 1.71±0.38         | 1.18±0.73                          | 1.32±0.57        | 1.12±0.58                         | 0.477                 |
| <i>ACAA1</i>  | 1.24±0.19         | 0.79±0.56                          | 0.98±0.40        | 1.10±0.47                         | 0.483                 |
| <i>HPD</i>    | 1.45±0.77         | 2.23±0.89                          | 1.24±0.71        | 1.37±1.05                         | 0.489                 |
| <i>ACSL3</i>  | 0.93±0.27         | 1.04±0.40                          | 0.81±0.18        | 1.01±0.19                         | 0.518                 |
| <i>PAH</i>    | 1.25±0.28         | 1.20±0.50                          | 0.92±0.40        | 1.05±0.40                         | 0.518                 |
| <i>PDK2</i>   | 1.39±0.32         | 0.98±0.36                          | 1.17±0.38        | 1.12±0.60                         | 0.538                 |
| <i>HSL</i>    | 1.09±0.45         | 1.13±0.70                          | 2.28±1.62        | 1.04±0.33                         | 0.617                 |
| <i>SCD</i>    | 1.55±0.68         | 2.44±1.73                          | 1.22±0.84        | 1.26±0.97                         | 0.617                 |
| <i>FABP4</i>  | 1.29±0.86         | 1.60±0.75                          | 1.05±0.24        | 1.13±0.65                         | 0.649                 |
| <i>BCKDHA</i> | 1.16±0.33         | 1.21±0.44                          | 1.32±0.23        | 1.07±0.42                         | 0.699                 |
| <i>HMGCS2</i> | 1.13±0.31         | 1.13±0.50                          | 0.93±0.17        | 1.08±0.42                         | 0.699                 |
| <i>ACADM</i>  | 0.92±0.08         | 0.99±0.28                          | 0.90±0.11        | 1.05±0.34                         | 0.810                 |
| <i>PDK1</i>   | 1.04±0.35         | 1.30±0.58                          | 1.00±0.15        | 1.05±0.38                         | 0.817                 |
| <i>FABP1</i>  | 1.68±0.70         | 1.29±0.73                          | 1.37±0.68        | 1.20±0.55                         | 0.879                 |
| <i>IDH2</i>   | 1.13±0.23         | 1.02±0.41                          | 0.99±0.27        | 1.04±0.30                         | 0.879                 |

False discovery rate (FDR)-adjusted *P*-values are for Welch's ANOVA tests for differences in group means.
