# Supplementary material for: Hibernating above the permafrost: effects of ambient temperature and season on expression of metabolic genes in liver and brown adipose tissue of arctic ground squirrels
Source: Oxford University Press journal article supplement (doi:10.1242/jeb.052159), 2011-03-23
Supplement: jeb052159tables4.pdf [file jeb052159tables4.pdf]

Table S4. Normalized gene expression values (means  $\pm$  s.d.) for BAT samples taken from arctic ground squirrels hibernating at ambient temperatures of +2 and  $-10^{\circ}\text{C}$  during late arousal and late torpor

| Gene          | +2°C late arousal | $-10^{\circ}\text{C}$ late arousal | +2°C late torpor | $-10^{\circ}\text{C}$ late torpor | FDR-adjusted <i>P</i> |
|---------------|-------------------|------------------------------------|------------------|-----------------------------------|-----------------------|
| <i>IDH2</i>   | 2.00 $\pm$ 0.48   | 1.29 $\pm$ 0.24                    | 1.88 $\pm$ 0.41  | 1.01 $\pm$ 0.18                   | 0.111                 |
| <i>ACSL3</i>  | 1.21 $\pm$ 0.24   | 1.22 $\pm$ 0.57                    | 0.66 $\pm$ 0.09  | 1.03 $\pm$ 0.29                   | 0.111                 |
| <i>GOT1</i>   | 0.77 $\pm$ 0.26   | 1.20 $\pm$ 0.29                    | 0.55 $\pm$ 0.15  | 1.03 $\pm$ 0.27                   | 0.111                 |
| <i>BDH2</i>   | 1.18 $\pm$ 0.18   | 1.16 $\pm$ 0.26                    | 0.73 $\pm$ 0.15  | 1.04 $\pm$ 0.33                   | 0.154                 |
| <i>GSY2</i>   | 0.42 $\pm$ 0.16   | 0.47 $\pm$ 0.13                    | 0.60 $\pm$ 0.31  | 1.04 $\pm$ 0.30                   | 0.155                 |
| <i>PCK1</i>   | 0.75 $\pm$ 0.17   | 0.94 $\pm$ 0.28                    | 0.70 $\pm$ 0.17  | 1.00 $\pm$ 0.09                   | 0.195                 |
| <i>HK1</i>    | 0.79 $\pm$ 0.21   | 1.15 $\pm$ 0.38                    | 0.72 $\pm$ 0.05  | 1.02 $\pm$ 0.19                   | 0.195                 |
| <i>FABP4</i>  | 0.75 $\pm$ 0.10   | 1.04 $\pm$ 0.22                    | 0.90 $\pm$ 0.1   | 1.01 $\pm$ 0.16                   | 0.230                 |
| <i>OXCT1</i>  | 0.58 $\pm$ 0.21   | 1.26 $\pm$ 0.49                    | 0.61 $\pm$ 0.19  | 1.07 $\pm$ 0.39                   | 0.230                 |
| <i>ACAA2</i>  | 1.30 $\pm$ 0.25   | 0.96 $\pm$ 0.08                    | 1.22 $\pm$ 0.23  | 1.01 $\pm$ 0.13                   | 0.265                 |
| <i>HADHSC</i> | 1.28 $\pm$ 0.13   | 1.15 $\pm$ 0.19                    | 1.20 $\pm$ 0.30  | 1.01 $\pm$ 0.14                   | 0.271                 |
| <i>PYGB</i>   | 0.99 $\pm$ 0.26   | 1.23 $\pm$ 0.70                    | 0.69 $\pm$ 0.16  | 1.02 $\pm$ 0.21                   | 0.271                 |
| <i>ACAA1</i>  | 0.66 $\pm$ 0.29   | 0.61 $\pm$ 0.24                    | 0.65 $\pm$ 0.20  | 1.03 $\pm$ 0.26                   | 0.298                 |
| <i>ACADM</i>  | 0.99 $\pm$ 0.20   | 1.10 $\pm$ 0.18                    | 1.27 $\pm$ 0.16  | 1.00 $\pm$ 0.11                   | 0.305                 |
| <i>GSK3A</i>  | 1.23 $\pm$ 0.28   | 1.26 $\pm$ 0.34                    | 0.84 $\pm$ 0.19  | 1.03 $\pm$ 0.31                   | 0.305                 |
| <i>HMGCL</i>  | 1.51 $\pm$ 0.28   | 1.14 $\pm$ 0.35                    | 1.35 $\pm$ 0.46  | 1.03 $\pm$ 0.26                   | 0.331                 |
| <i>SCD</i>    | 1.32 $\pm$ 0.65   | 2.99 $\pm$ 3.11                    | 0.67 $\pm$ 0.26  | 1.05 $\pm$ 0.39                   | 0.338                 |
| <i>PDK1</i>   | 0.93 $\pm$ 0.12   | 1.26 $\pm$ 0.22                    | 1.03 $\pm$ 0.16  | 1.04 $\pm$ 0.30                   | 0.338                 |
| <i>GSY1</i>   | 1.19 $\pm$ 0.60   | 1.42 $\pm$ 0.37                    | 0.90 $\pm$ 0.18  | 1.02 $\pm$ 0.19                   | 0.353                 |
| <i>HSL</i>    | 0.74 $\pm$ 0.10   | 1.13 $\pm$ 0.38                    | 0.83 $\pm$ 0.34  | 1.04 $\pm$ 0.37                   | 0.374                 |
| <i>PKM2</i>   | 0.79 $\pm$ 0.17   | 0.89 $\pm$ 0.17                    | 0.77 $\pm$ 0.15  | 1.02 $\pm$ 0.22                   | 0.443                 |
| <i>FABP1</i>  | 22.83 $\pm$ 39.67 | 45.97 $\pm$ 51.35                  | 7.41 $\pm$ 9.78  | 2.62 $\pm$ 2.30                   | 0.443                 |
| <i>ELOVL6</i> | 1.48 $\pm$ 0.76   | 6.72 $\pm$ 11.74                   | 0.85 $\pm$ 0.18  | 1.02 $\pm$ 0.23                   | 0.443                 |
| <i>PDHE1B</i> | 0.95 $\pm$ 0.13   | 1.10 $\pm$ 0.46                    | 0.73 $\pm$ 0.20  | 1.04 $\pm$ 0.32                   | 0.443                 |
| <i>PDK2</i>   | 1.04 $\pm$ 0.49   | 1.09 $\pm$ 0.38                    | 0.81 $\pm$ 0.11  | 1.03 $\pm$ 0.24                   | 0.443                 |
| <i>UGP2</i>   | 0.94 $\pm$ 0.18   | 1.24 $\pm$ 0.22                    | 1.10 $\pm$ 0.20  | 1.00 $\pm$ 0.09                   | 0.443                 |
| <i>CPT1A</i>  | 0.86 $\pm$ 0.25   | 1.15 $\pm$ 0.15                    | 0.99 $\pm$ 0.26  | 1.03 $\pm$ 0.27                   | 0.443                 |
| <i>CPT1B</i>  | 0.79 $\pm$ 0.14   | 0.85 $\pm$ 0.12                    | 1.03 $\pm$ 0.22  | 1.05 $\pm$ 0.38                   | 0.443                 |
| <i>PCK2</i>   | 1.15 $\pm$ 0.15   | 0.93 $\pm$ 0.21                    | 1.24 $\pm$ 0.27  | 1.03 $\pm$ 0.28                   | 0.443                 |
| <i>HMGCS2</i> | 1.09 $\pm$ 1.03   | 0.67 $\pm$ 0.39                    | 0.58 $\pm$ 0.32  | 1.11 $\pm$ 0.48                   | 0.443                 |
| <i>CACT</i>   | 0.79 $\pm$ 0.20   | 0.97 $\pm$ 0.13                    | 0.87 $\pm$ 0.12  | 1.02 $\pm$ 0.25                   | 0.547                 |
| <i>GPD1</i>   | 0.92 $\pm$ 0.36   | 1.56 $\pm$ 0.62                    | 1.09 $\pm$ 0.41  | 1.03 $\pm$ 0.28                   | 0.566                 |
| <i>HADHA</i>  | 0.93 $\pm$ 0.16   | 0.99 $\pm$ 0.10                    | 1.16 $\pm$ 0.21  | 1.01 $\pm$ 0.17                   | 0.566                 |
| <i>PFKL</i>   | 1.13 $\pm$ 0.10   | 1.04 $\pm$ 0.18                    | 1.01 $\pm$ 0.16  | 1.01 $\pm$ 0.14                   | 0.566                 |
| <i>GLUD1</i>  | 1.12 $\pm$ 0.20   | 1.13 $\pm$ 0.23                    | 0.96 $\pm$ 0.10  | 1.00 $\pm$ 0.09                   | 0.566                 |
| <i>GOT2</i>   | 1.20 $\pm$ 0.47   | 0.99 $\pm$ 0.23                    | 0.88 $\pm$ 0.15  | 1.00 $\pm$ 0.11                   | 0.601                 |
| <i>LDHB</i>   | 0.89 $\pm$ 0.12   | 1.03 $\pm$ 0.29                    | 0.97 $\pm$ 0.15  | 1.02 $\pm$ 0.23                   | 0.744                 |
| <i>ACAT2</i>  | 1.09 $\pm$ 0.24   | 1.02 $\pm$ 0.42                    | 0.87 $\pm$ 0.22  | 1.01 $\pm$ 0.18                   | 0.744                 |
| <i>IDH3B</i>  | 1.25 $\pm$ 0.28   | 1.13 $\pm$ 0.22                    | 1.25 $\pm$ 0.24  | 1.03 $\pm$ 0.31                   | 0.745                 |
| <i>BCKDHA</i> | 1.09 $\pm$ 0.21   | 1.01 $\pm$ 0.15                    | 1.24 $\pm$ 0.37  | 1.02 $\pm$ 0.20                   | 0.798                 |
| <i>GAPDH</i>  | 1.01 $\pm$ 0.39   | 1.02 $\pm$ 0.38                    | 0.91 $\pm$ 0.13  | 1.01 $\pm$ 0.14                   | 0.837                 |
| <i>CS</i>     | 0.96 $\pm$ 0.13   | 1.03 $\pm$ 0.19                    | 1.11 $\pm$ 0.29  | 1.02 $\pm$ 0.21                   | 0.898                 |
| <i>MDH2</i>   | 1.00 $\pm$ 0.14   | 1.06 $\pm$ 0.26                    | 1.09 $\pm$ 0.17  | 1.01 $\pm$ 0.19                   | 0.912                 |
| <i>ACACB</i>  | 1.02 $\pm$ 0.29   | 1.07 $\pm$ 0.21                    | 0.94 $\pm$ 0.18  | 1.03 $\pm$ 0.25                   | 0.912                 |
| <i>BCKDHB</i> | 1.02 $\pm$ 0.28   | 1.03 $\pm$ 0.13                    | 0.89 $\pm$ 0.28  | 1.04 $\pm$ 0.34                   | 0.912                 |
| <i>CRAT</i>   | 1.09 $\pm$ 0.15   | 0.98 $\pm$ 0.24                    | 1.08 $\pm$ 0.22  | 1.04 $\pm$ 0.35                   | 0.939                 |
| <i>SUCLG1</i> | 1.08 $\pm$ 0.12   | 1.04 $\pm$ 0.18                    | 1.13 $\pm$ 0.24  | 1.02 $\pm$ 0.24                   | 0.954                 |
| <i>ACAT1</i>  | 0.96 $\pm$ 0.15   | 0.98 $\pm$ 0.30                    | 0.95 $\pm$ 0.15  | 1.02 $\pm$ 0.24                   | 0.960                 |
| <i>AGPAT3</i> | 1.15 $\pm$ 0.31   | 1.05 $\pm$ 0.19                    | 1.07 $\pm$ 0.18  | 1.05 $\pm$ 0.36                   | 0.960                 |
| <i>ACADVL</i> | 1.09 $\pm$ 0.31   | 1.06 $\pm$ 0.10                    | 1.05 $\pm$ 0.22  | 1.02 $\pm$ 0.19                   | 0.960                 |

False discovery rate (FDR)-adjusted *P*-values are for Welch's ANOVA tests for differences in group means.
